# Supplementary material for: Joint Effects of Low Ambient Temperature and Nocturnal Eating Behavior Contributing to Glycolipid Metabolism Disorder by Changing Gut Microbiota Structure
Source: Research Square preprint supplement (doi:10.21203/rs.3.rs-6258553/v1), 2025-11-10
Supplement: Supplementary file 1 [file 01b53b5dfe9e745ad1885747.docx]

Joint Effects of Low Ambient Temperature and Nocturnal Eating Behavior contributing to Glycolipid Metabolism disorder by changing Gut Microbiota structure

Yinglan Shi1+, Zhaoxia Huang1+, Xiaofang Tang1, Yongqin Zhang1, Die Shi1, Jing Chen1, Qingxue Wang1*, Jun Li1*

1Guizhou University of Traditional Chinese Medicine, Guiyang 550025, China

* **Correspondence:** Qingxue Wang ([957784686@qq.com](mailto:957784686@qq.com)), Jun Li ([speker@163.com](mailto:speker@163.com))

**+First author:** Yinglan Shi and Zhaoxia Huang share the first author

Other authors' email addresses:

[2854724406@qq.com](mailto:2854724406@qq.com)(**Yinglan Shi**)

[huangzhaoxia180@gyctcm.edu.cu](mailto:huangzhaoxia180@gyctcm.edu.cu);( **Zhaoxia Huang**)

[txf0113@163.com](mailto:txf0113@163.com) (**Xiaofang Tang**);

[zhangyongqin044@gzy.edu.cn](mailto:zhangyongqin044@gzy.edu.cn) (**Yongqin Zhang**);

[1414977193@qq.com](mailto:1414977193@qq.com) (**Die Shi**);

[605728126@qq.com](mailto:605728126@qq.com%20) (**Jing Chen**)

Table S3 Chromatographic data on neurotransmitters in serum

| **Name** | **Standard curve** | **Retention period（min）** |
| --- | --- | --- |
| 5-hydroxytryptamine | **y=5.131x-20.855; R2=0.9993** | **7.700** |
| Melatonin | **y=5.054x-2.112; R2=0.9998** | **24.100** |


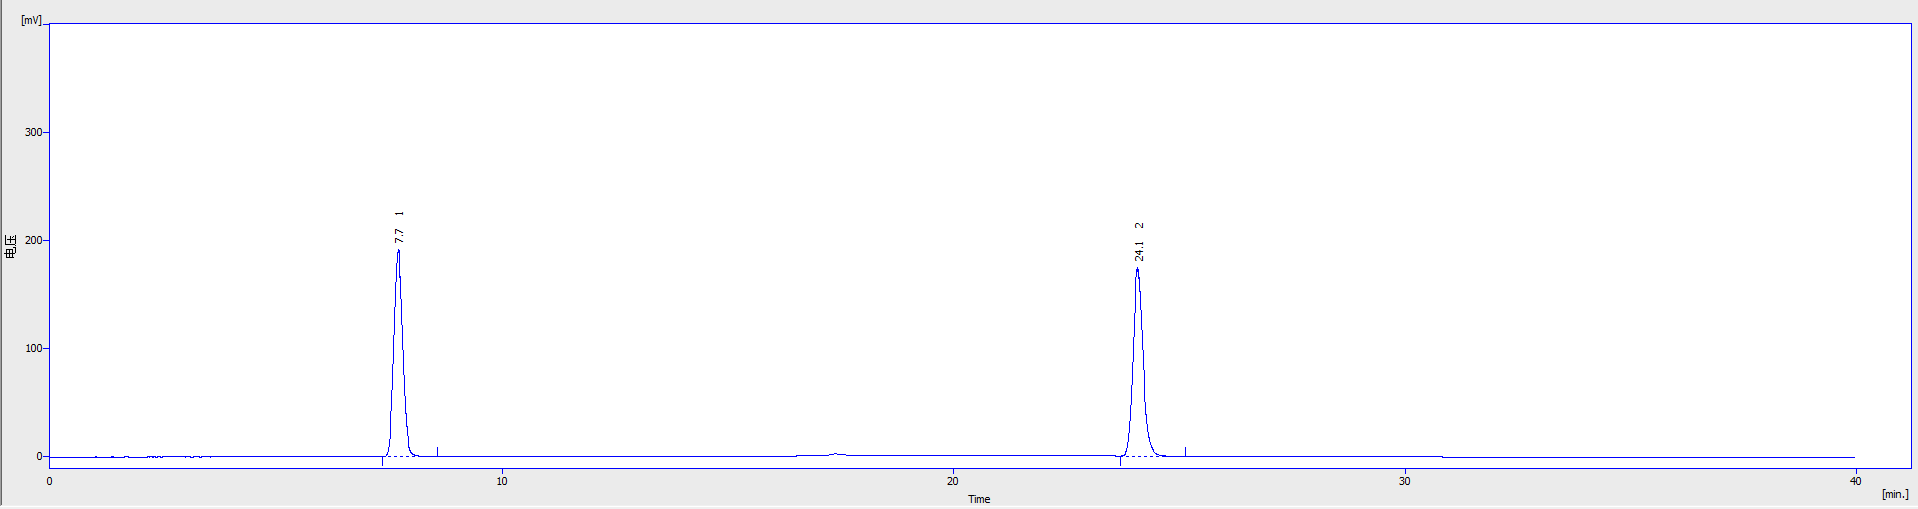


Figure 1 Chromatogram of the standard (1 is 5-hydroxytryptamine; 2 is Melatonin)


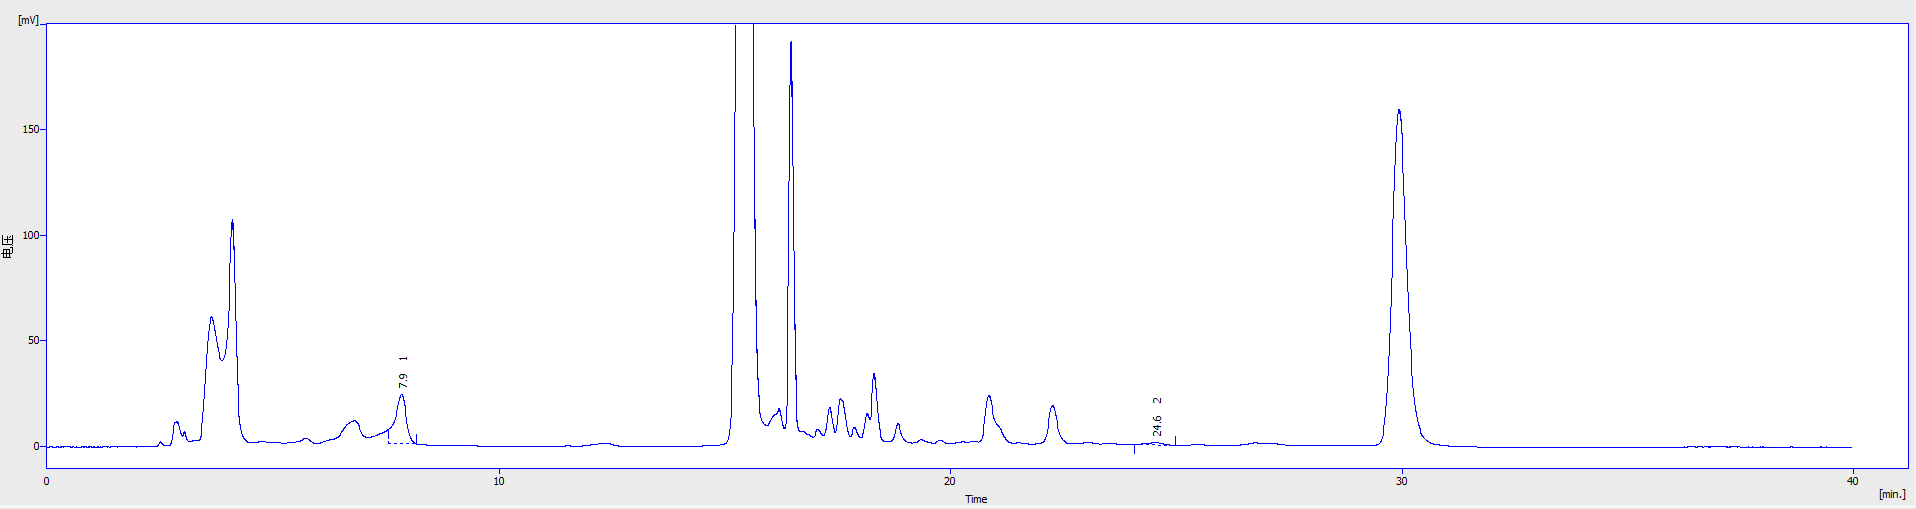


Figure 2 Chromatogram of the sample (1 is 5-hydroxytryptamine; 2 is Melatonin)

| **Name** | **Standard curve** | **Retention period（min）** |
| --- | --- | --- |
| **Norepinephrine** | **y=0.722x-16.598; R2=0.9996** | **2.900** |
| **Dopamine** | **y=0.0574x-4.681; R2=0.9995** | **3.900** |


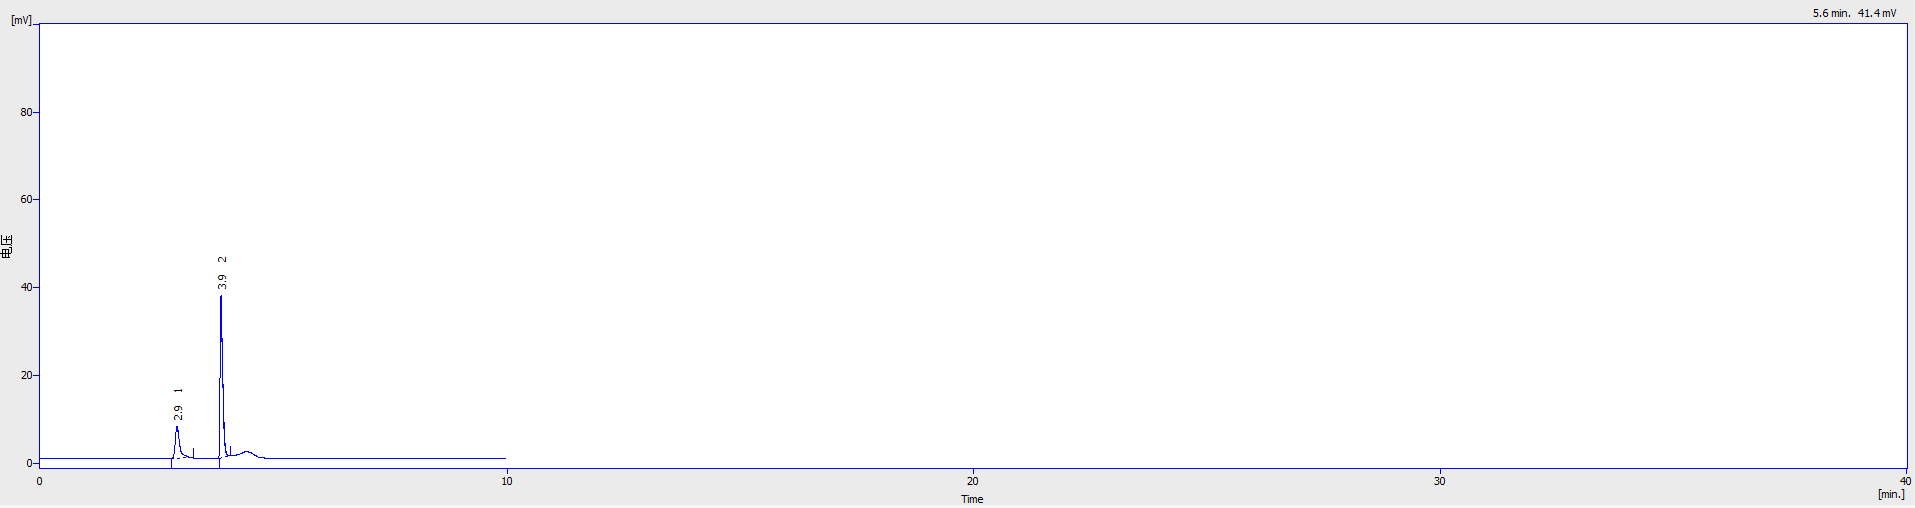


**Figure 3 Chromatogram of the standard (1 is Norepinephrine; 2 is Dopamine)**


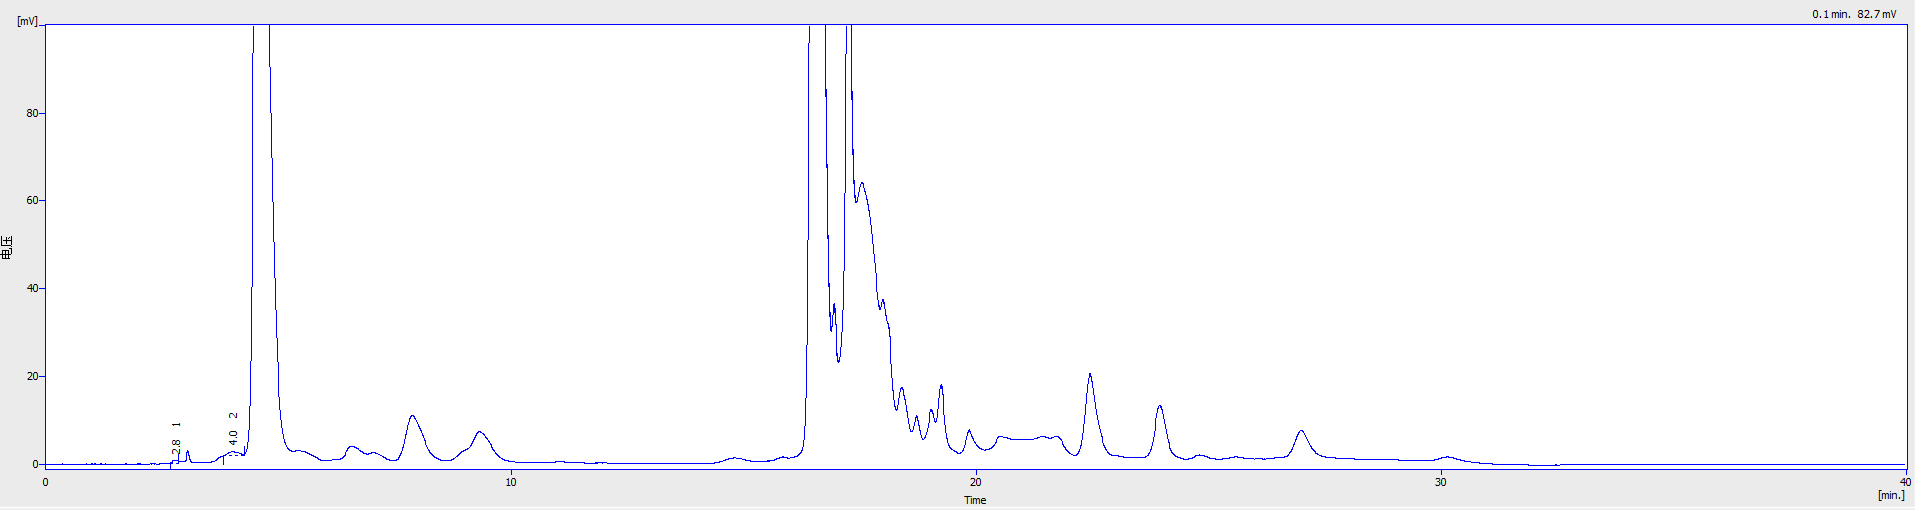


**Figure 4 Chromatogram of the sample(1 is Norepinephrine; 2 is Dopamine)**


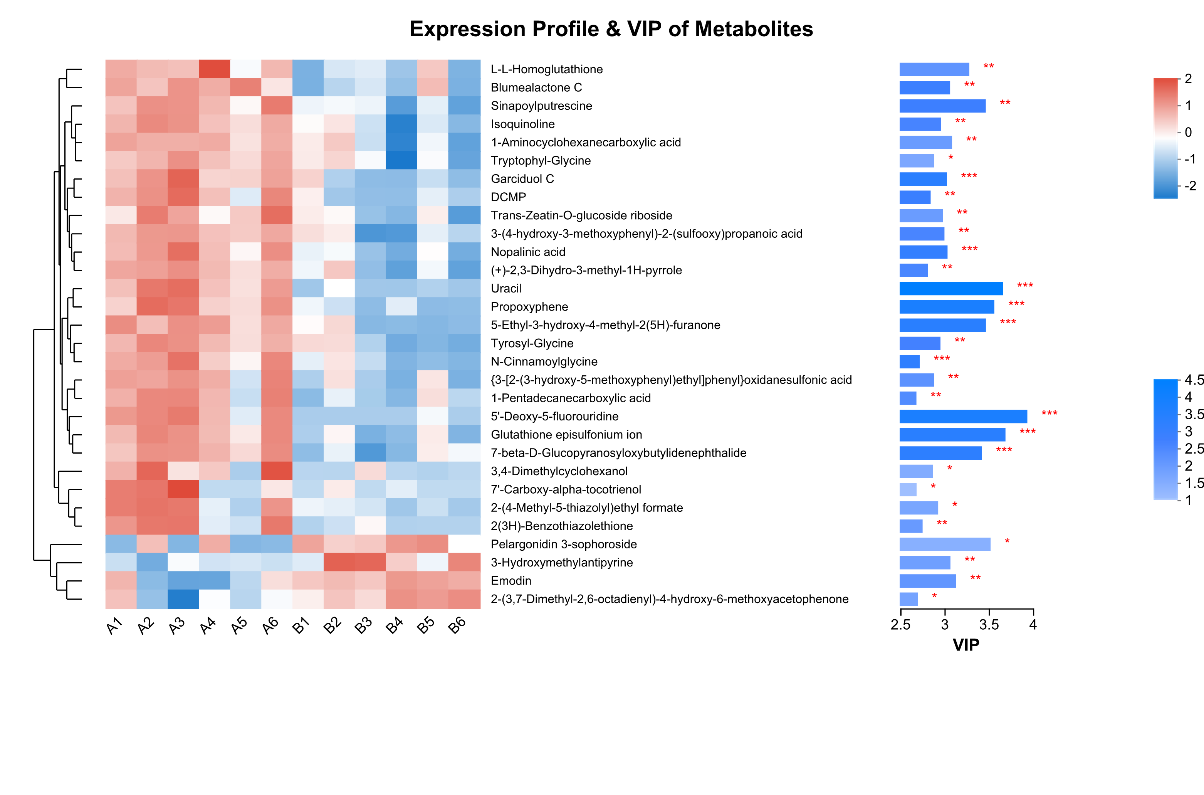


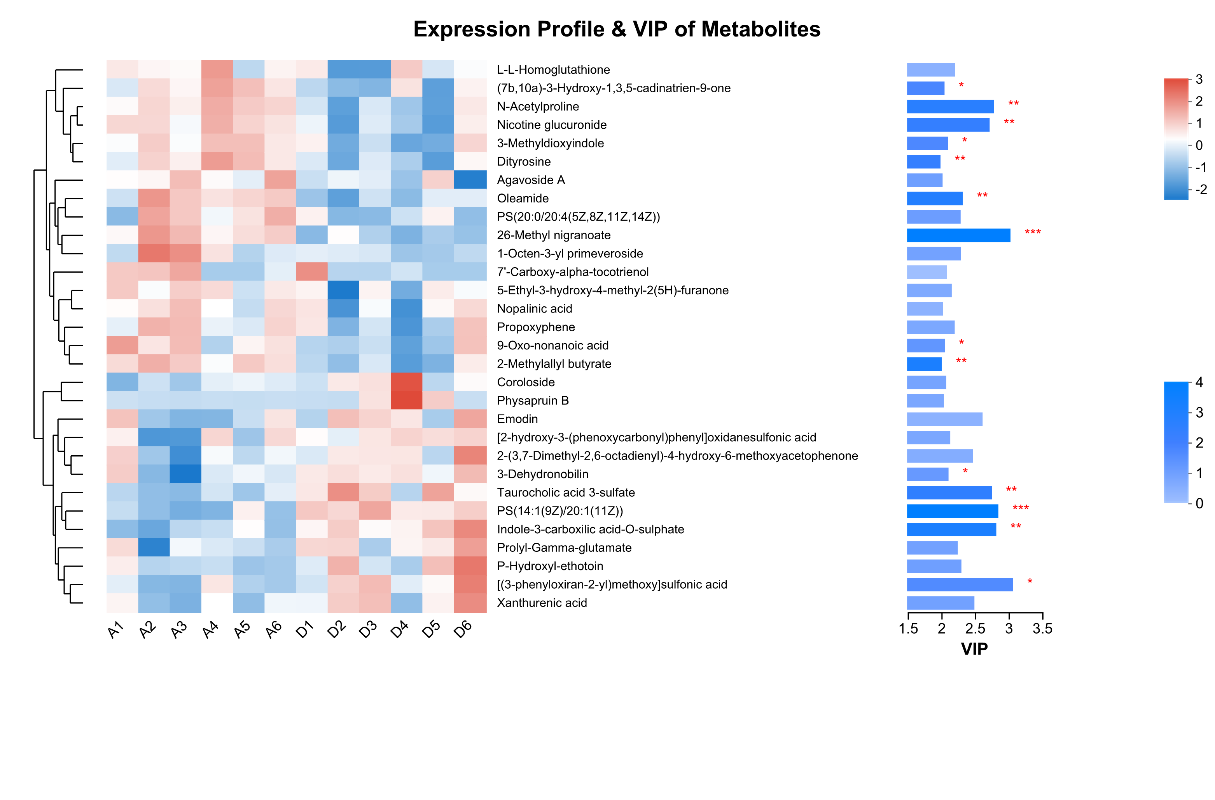


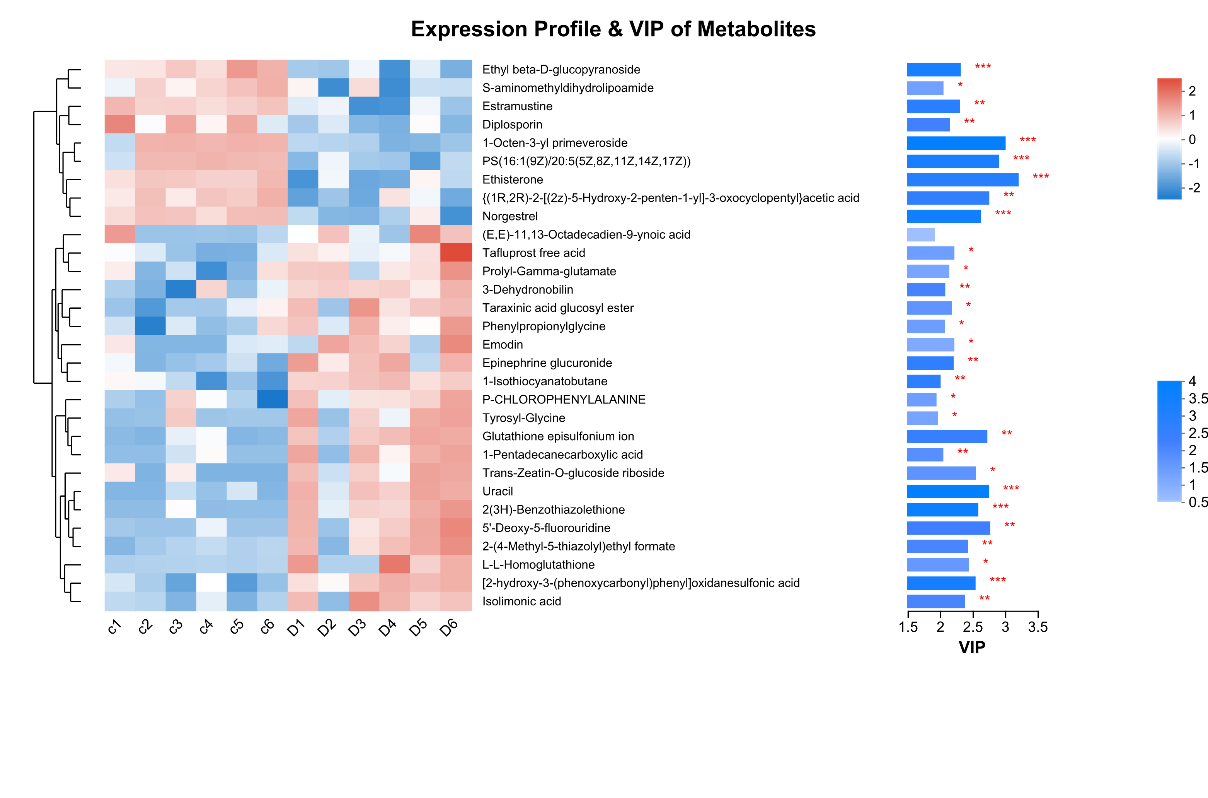


**Figure S1 Metabolite expression profiles and VIP values**
